# Supplementary material
Source: PubMed Central journal article supplement (PMC7003207)
Supplement: ao9b03516_si_001.pdf [file ao9b03516_si_001.pdf]

## SUPPORTING INFORMATION

### DESIGN OF RUBBER COMPOSITES WITH AUTONOMOUS SELF-HEALING CAPABILITY

Saul Utrera-Barrios; Marianella Hernández Santana\*; Raquel Verdejo; Miguel A. López-Manchado

*Institute of Polymer Science and Technology (ICTP-CSIC), Juan de la Cierva 3, 28006 Madrid, Spain*

\*corresponding author: marherna@ictp.csic.es

#### SI.1. Curing curves and crosslink density of ENR compounds and ENR-TRGO nanocomposites

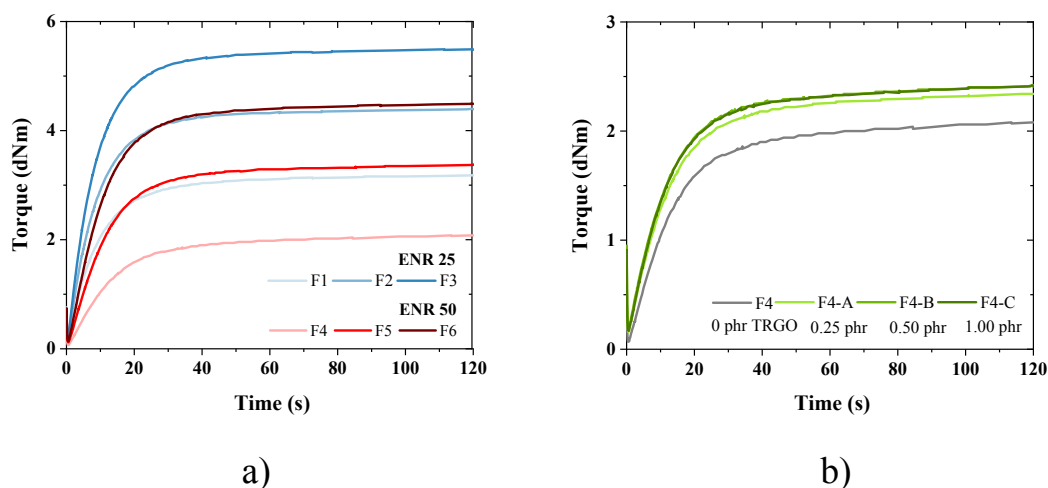

Figure S 1. a) Curing curves of ENR compounds, b) Curing curves of ENR-TRGO nanocomposites.

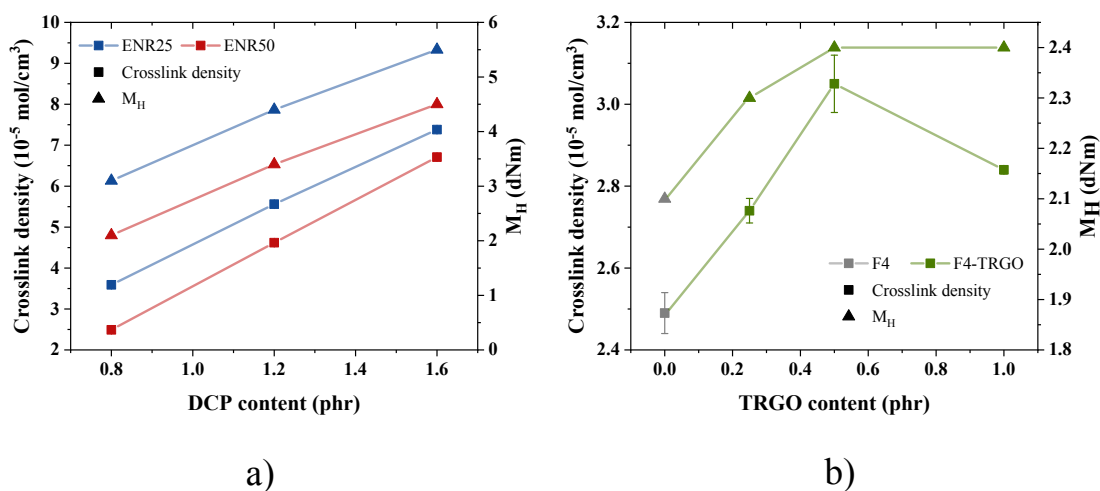

Figure S 2. a) Crosslink density of ENR compounds, b) Crosslink density of ENR-TRGO nanocomposites.

## SI.2. Mechanical properties of ENR compounds.

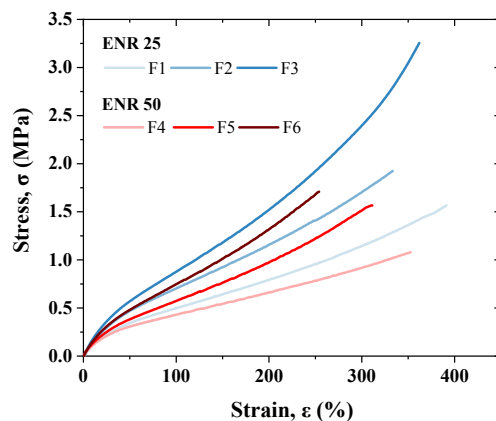

Figure S 3. Stress-strain curves of ENR compounds.

Table S 1. Mechanical properties of ENR compounds.

| Compound | $M_H$<br>(dN.m) | $\nu \cdot 10^{-5}$<br>(mol/cm <sup>3</sup> ) | $M_{100}$<br>(MPa) | $M_{300}$<br>(MPa) | $\sigma_R$<br>(MPa) | $\epsilon_R$<br>(%) |
|----------|-----------------|-----------------------------------------------|--------------------|--------------------|---------------------|---------------------|
| F1       | 3.14 ± 0.04     | 3.59 ± 0.05                                   | 0.51 ± 0.01        | 1.16 ± 0.01        | 1.58 ± 0.02         | 394 ± 04            |
| F2       | 4.36 ± 0.04     | 5.57 ± 0.03                                   | 0.70 ± 0.01        | 1.70 ± 0.01        | 1.90 ± 0.04         | 328 ± 06            |
| F3       | 5.48 ± 0.01     | 7.38 ± 0.09                                   | 0.87 ± 0.01        | 2.44 ± 0.05        | 3.2 ± 0.1           | 350 ± 12            |
| F4       | 2.08 ± 0.01     | 2.49 ± 0.05                                   | 0.45 ± 0.02        | 0.95 ± 0.03        | 1.08 ± 0.03         | 349 ± 18            |
| F5       | 3.38 ± 0.01     | 4.63 ± 0.02                                   | 0.59 ± 0.02        | 1.52 ± 0.01        | 1.61 ± 0.05         | 315 ± 08            |
| F6       | 4.50 ± 0.00     | 6.71 ± 0.09                                   | 0.76 ± 0.01        | 2.11 ± 0.01        | 1.7 ± 0.3           | 251 ± 35            |

### SI.3. Infrared spectra of ENR compounds.

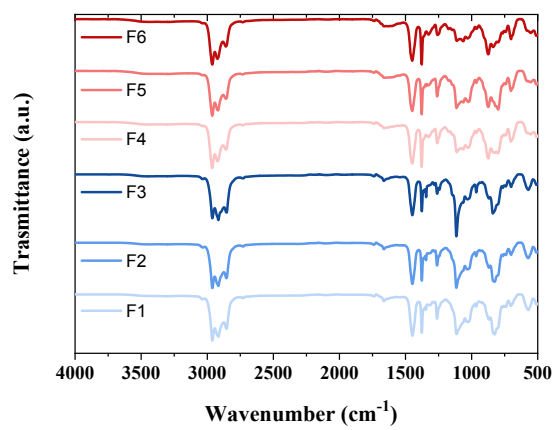

Figure S 4. Infrared spectra of ENR compounds.

#### SI.4. Mechanical properties of ENR-TRGO nanocomposites

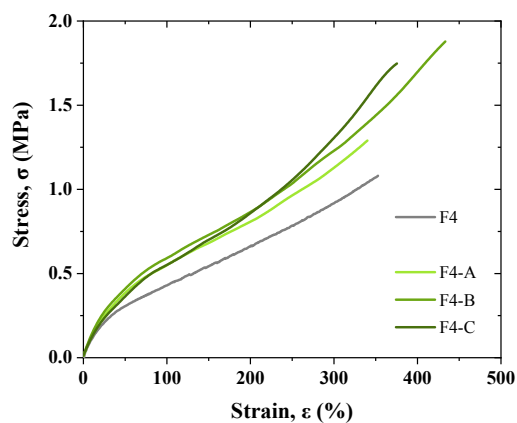

Figure S 5. Stress-strain curves of ENR-TRGO nanocomposites.

Table S 2. Mechanical properties of ENR-TRGO nanocomposites.

| <b>Compound</b> | <b><math>M_H</math></b><br>(dN.m) | <b><math>\nu \cdot 10^{-5}</math></b><br>(mol/cm <sup>3</sup> ) | <b><math>M_{100}</math></b><br>(MPa) | <b><math>M_{300}</math></b><br>(MPa) | <b><math>\sigma_R</math></b><br>(MPa) | <b><math>\epsilon_R</math></b><br>(%) |
|-----------------|-----------------------------------|-----------------------------------------------------------------|--------------------------------------|--------------------------------------|---------------------------------------|---------------------------------------|
| F4              | 2.08 ± 0.01                       | 2.49 ± 0.05                                                     | 0.45 ± 0.02                          | 0.95 ± 0.03                          | 1.08 ± 0.03                           | 349 ± 18                              |
| F4-A            | 2.32 ± 0.03                       | 2.74 ± 0.03                                                     | 0.54 ± 0.04                          | 0.94 ± 0.09                          | 1.3 ± 0.2                             | 336 ± 49                              |
| F4-B            | 2.42 ± 0.01                       | 3.05 ± 0.09                                                     | 0.57 ± 0.01                          | 1.21 ± 0.02                          | 1.85 ± 0.07                           | 431 ± 16                              |
| F4-C            | 2.40 ± 0.02                       | 2.84 ± 0.01                                                     | 0.56 ± 0.01                          | 1.29 ± 0.02                          | 1.7 ± 0.2                             | 376 ± 33                              |

### SI.5. Stress-strain curves of F4-B before and after healing protocol

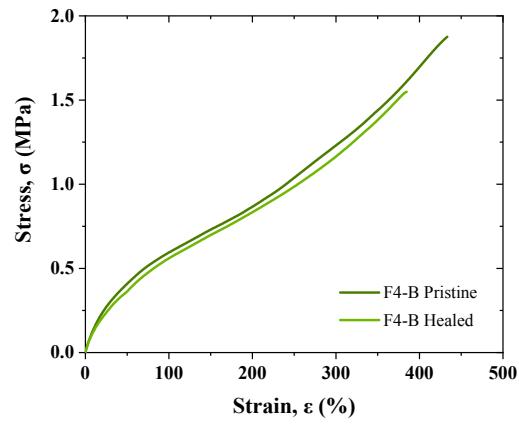

Figure S 6. Stress-strain curves of F4-B before and after healing protocol.

## SI.6. Characterization of TRGO

Raman spectroscopy was carried out in a *Renishaw Invia* Raman Confocal microscope using an argon laser radiation source with an excitation wavelength of 514.5 nm. Three spectra were recorded from 250  $\text{cm}^{-1}$  to 3000  $\text{cm}^{-1}$ . The crystallinity and the disorder in the basal-plane were determined from the area of the peaks of the corresponding bands. FT-IR spectroscopy was used to analyze the TRGO functionalization using potassium bromide (KBr) pellets in a *Perkin Elmer* spectrometer, model UATR Two. Spectra were taken from 400  $\text{cm}^{-1}$  to 4000  $\text{cm}^{-1}$  with a resolution of 4  $\text{cm}^{-1}$ . Pure KBr spectrum was used as background. X-ray photoemission spectroscopy (XPS) analysis was performed on a *Fisons MT500* spectrometer, operated at 300 W, with a non-monochromatized radiation source of  $\text{MgK}\alpha$  of photon energy equal to 1253.36 eV. The deconvolution was done in *Origin Pro*, with a Shirley type baseline and Gaussian adjustment.

Raman spectroscopy is commonly used to analyze the graphitic quality of carbon materials by comparing the intensity ratio between the D, at 1360  $\text{cm}^{-1}$ , and G, at 1580  $\text{cm}^{-1}$ , bands ( $I_D/I_G$ ) (Figure S7). The results reflect the structural changes occurred during the oxidation and exfoliation treatment and show a significant increase in disorder, which is usually attributed to direct damage and functionalization of the surface.

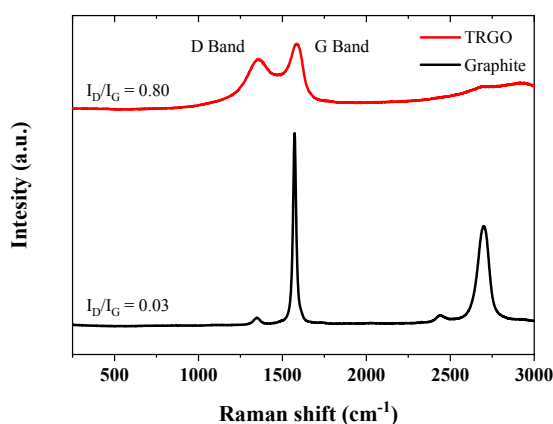

Figure S 7. Raman spectra of graphite and TRGO.

The nature of the functionalization was later established by XPS and FT-IR. The general XPS spectrum (Figure S9) reports the presence of carbon (~75 %) and oxygen (~25 %) atoms, by the relationship between their peaks and the deconvolution of the incorporated functionalities.

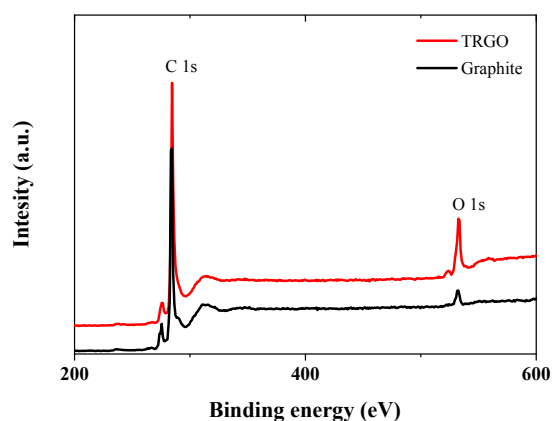

Figure S 8. General XPS spectra of graphite and TRGO.

Figure S3 shows the deconvolution performed on the C 1s and O 1s signals. Figure S9.a presents the deconvolution of the C 1s signal with the percentages of the different species. The components indicate the presence of: non-oxygenated ring C=C ( $sp^2$  hybridization) at 284.5 eV, the C-C ( $sp^3$  hybridization) at 285.8 eV, C-OH bonds at 286.6 eV, C-O-C group at 287.6 eV, carboxylate carbon at 288.8 eV and the  $\pi$ - $\pi^*$  interactions associated to the non-oxygenated ring C=C ( $sp^2$  hybridization) at 291.0 eV, which reveals the success of reduction. The deconvolution performed on the signal of O 1s (Figure S9.b) is consistent with the C 1s data and reveals the presence of C-O bonds (C-OH and C-O-C) at 533.3 eV and the O associated to the carboxylate group at 531.0 eV.<sup>1-2</sup>

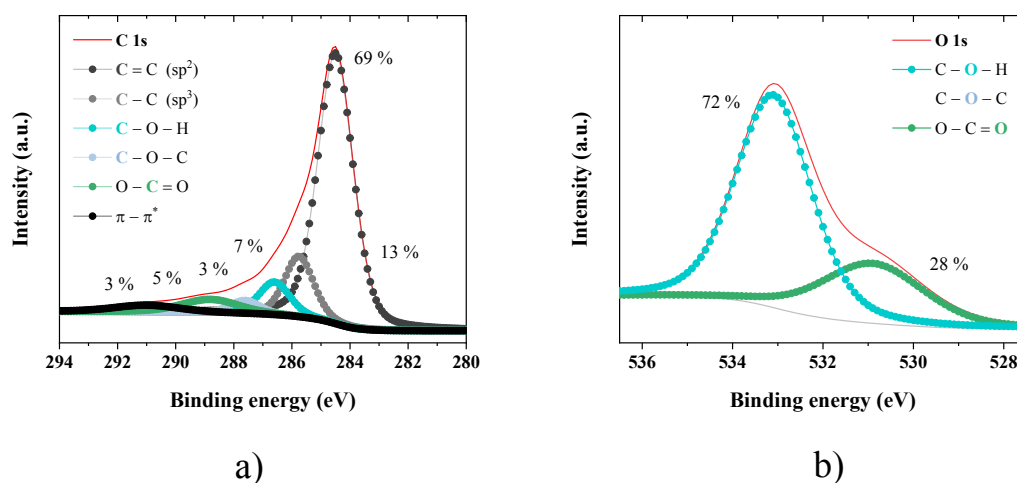

Figure S 9. Peak deconvolution of the a) C 1s and b) O 1s for TRGO.

The functional groups were corroborated by the analysis of their infrared spectrum (Figure S10). Characteristic bands of TRGO were identified at  $3400\text{ cm}^{-1}$  ( $-\text{OH}$  stretching vibration), at  $2960\text{ cm}^{-1}$ ,  $2920\text{ cm}^{-1}$  and  $2860\text{ cm}^{-1}$  ( $-\text{CH}$  stretching vibrations) and at  $1630\text{ cm}^{-1}$  ( $\text{C}=\text{C}$  bending in cyclic bonds). As for the epoxy groups attached to the TRGO cyclic structure, its characteristic peak is identified at  $890\text{ cm}^{-1}$ . A band at  $1110\text{ cm}^{-1}$  is also observed for the symmetrical stretching of type  $\text{C}-\text{O}-\text{C}$ . A small peak is present at  $1740\text{ cm}^{-1}$  associated with carboxylic groups, coinciding with XPS data.<sup>3</sup>

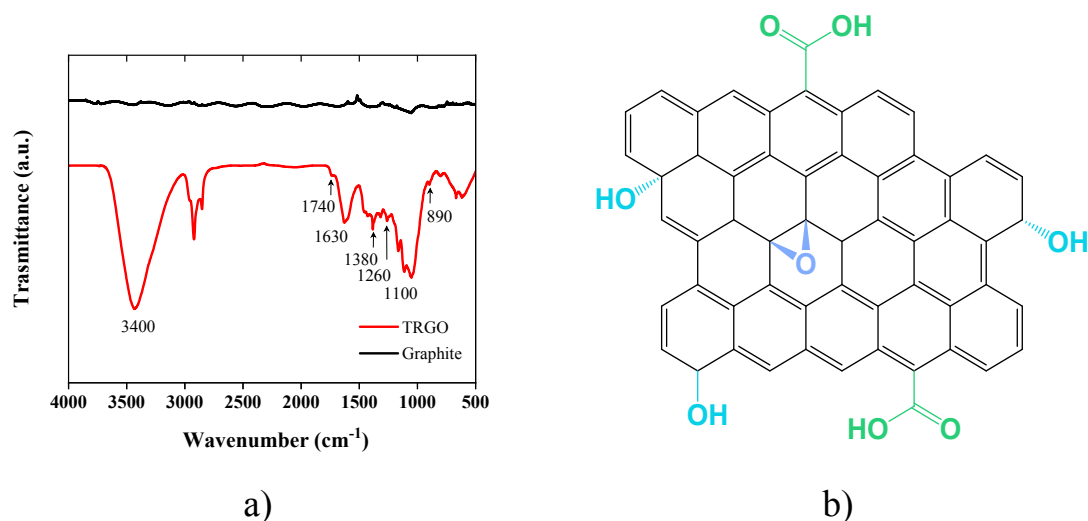

Figure S 10. a) FT-IR spectrum of graphite; b) scheme of TRGO with its functional group.

## REFERENCES

1. Stankovich, S.; Piner, R. D.; Chen, X.; Wu, N.; Nguyen, S. T.; Ruoff, R. S., Stable aqueous dispersions of graphitic nanoplatelets via the reduction of exfoliated graphite oxide in the presence of poly (sodium 4-styrenesulfonate). *J. Mater. Chem.* **2006**, *16* (2), 155-158.
2. Botas, C.; Álvarez, P.; Blanco, P.; Granda, M.; Blanco, C.; Santamaría, R.; Romasanta, L. J.; Verdejo, R.; López-Manchado, M. A.; Menéndez, R., Graphene materials with different structures prepared from the same graphite by the Hummers and Brodie methods. *Carbon* **2013**, *65*, 156-164.
3. Socrates, G., *Infrared and Raman Characteristic Group Frequencies*. 3rd ed.; John Wiley & Sons, LTD: England, 2001; pp 1-347.
